# Supplementary material for: Antigen array for serological diagnosis and novel allergen identification in severe equine asthma
Source: PubMed Central journal article supplement (PMC6811683; doi:10.1038/s41598-019-51820-7), 2019-10-23
Supplement: 41598_2019_51820_MOESM1_ESM.pdf [file 41598_2019_51820_MOESM1_ESM.pdf]

# Antigen array for serological diagnosis and novel allergen identification in severe equine asthma

S. White<sup>1,2,3\*</sup>, M. Moore-Colyer<sup>1</sup>, E. Marti<sup>4</sup>, D. Hannant<sup>5</sup>, V. Gerber<sup>4</sup>, L. Coüetil<sup>6</sup>, E.A. Richard<sup>7</sup>,  
<sup>8</sup> and M. Alcocer<sup>2</sup>.

<sup>1</sup>Royal Agricultural University, Cirencester, Gloucestershire, GL7 6JS, UK.

<sup>2</sup>School of Biosciences, University of Nottingham, Sutton Bonington Campus, Loughborough, LE12 5RD, UK.

<sup>3</sup>Nottingham Trent University, Brackenhurst Campus, Southwell, Nottinghamshire, NG25 0QF, UK.

<sup>4</sup>Department of Clinical Research and Veterinary Public Health, University of Bern, Bremgartenstr, Postfach, 3001 Bern, Switzerland.

<sup>5</sup>School of Veterinary Medicine and Science, University of Nottingham, Sutton Bonington Campus, Loughborough, LE12 5RD, UK.

<sup>6</sup>Veterinary Clinical Sciences, College of Veterinary Medicine, Purdue University, West Lafayette, IN, 47907, USA.

<sup>7</sup>LABÉO Frank Duncombe, 1 route de Rosel, 14053 Caen Cedex 4, France.

<sup>8</sup>Normandie Univ, UniCaen, BIOTARGEN, 3 rue Nelson Mandela, 14280 Saint-Contest, France.

\*samuel.white@ntu.ac.uk

Bland Altman plots to compare ELISA and microarray IgE with specific proteins. The acceptable level of bias is dictated by the solid line. The dashed lines represent the 95% limits of agreement as the mean difference (2 SD).

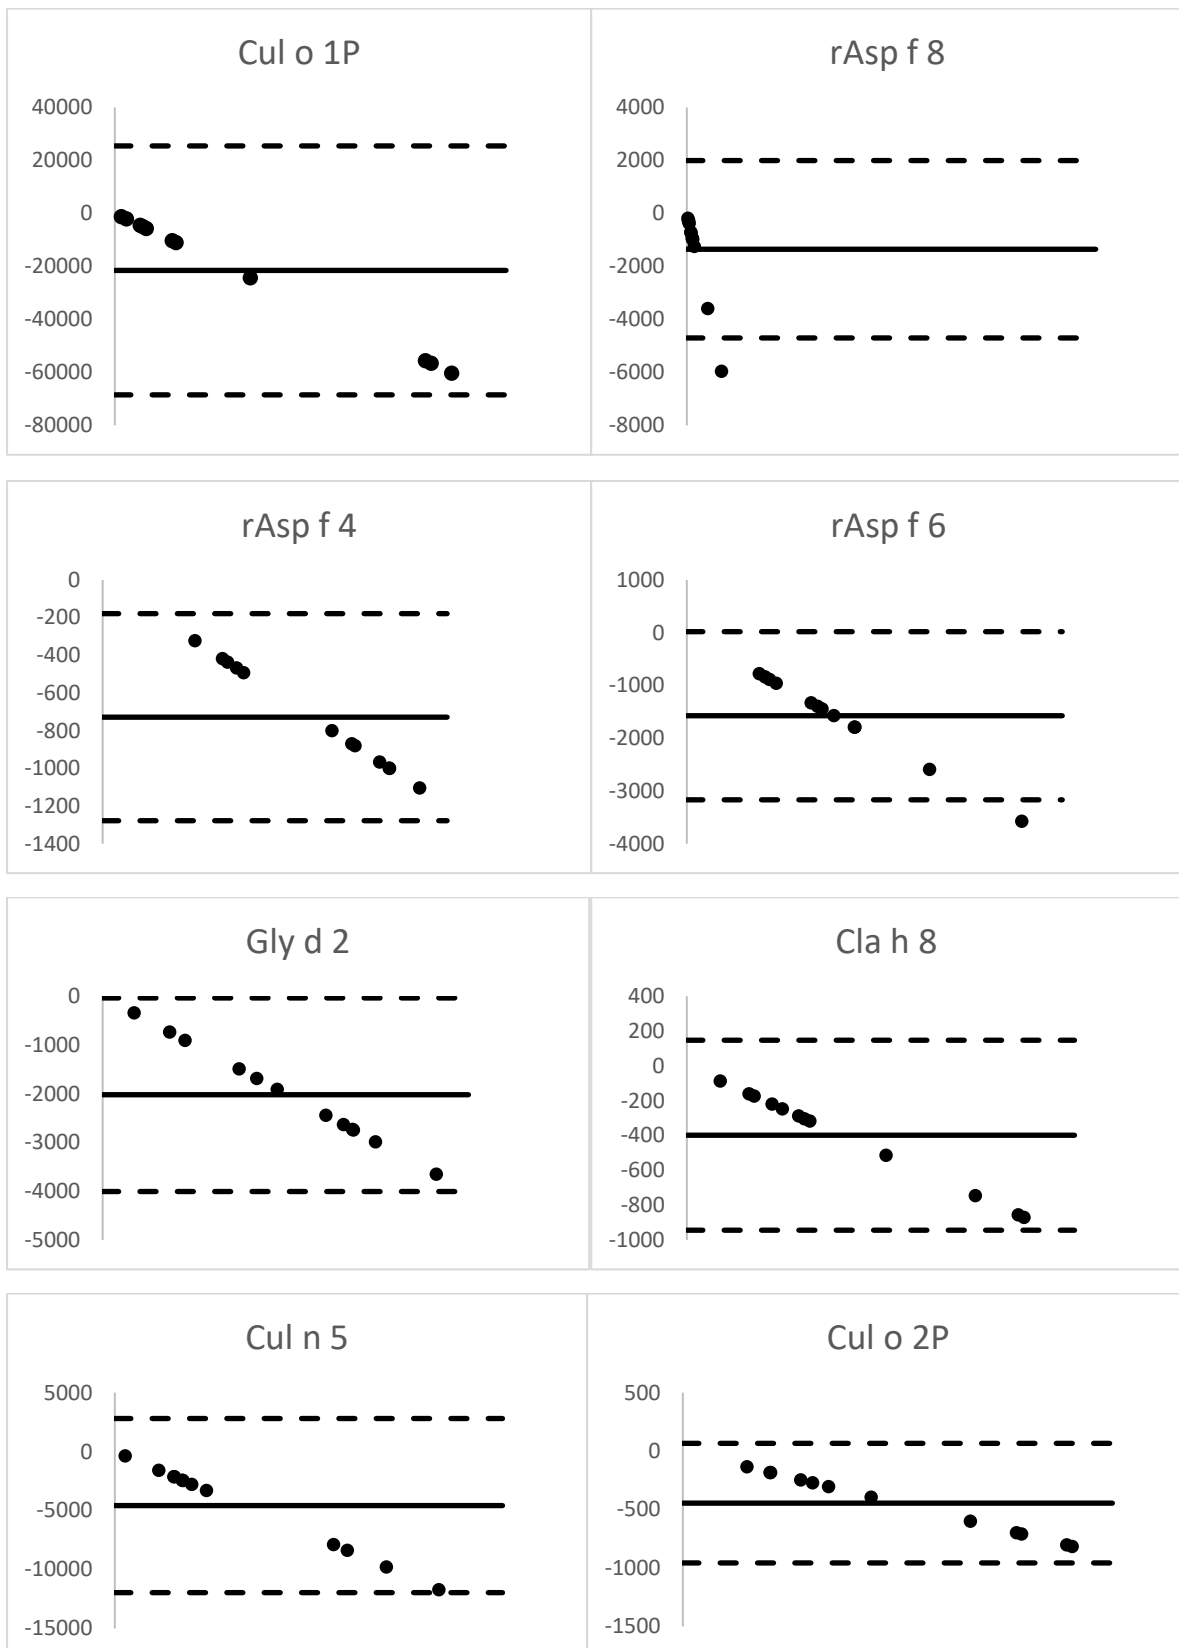

Summary of horses used in the study.

|                                                                                                                                                                                                                                           | <b>Switzerland</b>                                                      | <b>France</b>               | <b>USA</b>                  | <b>Canada</b>               |
|-------------------------------------------------------------------------------------------------------------------------------------------------------------------------------------------------------------------------------------------|-------------------------------------------------------------------------|-----------------------------|-----------------------------|-----------------------------|
| Number of horses                                                                                                                                                                                                                          | 16 sEA affected<br>24 IBH affected<br>23 IBH/sEA affected<br>40 control | 5 sEA affected<br>6 control | 6 sEA affected<br>6 control | 6 sEA affected<br>6 control |
| Horse Owner Assessed Respiratory Signs Index (HOARSI) (Ramseyer et al., 2007)                                                                                                                                                             | †                                                                       | na                          | na                          | na                          |
| Histamine/Metacholin Bronchoprovocation : (concentration of histamine when inhalation was stopped)                                                                                                                                        | †                                                                       | na                          | na                          | na                          |
| Partial pressure of arterial oxygen                                                                                                                                                                                                       | †                                                                       | na                          | na                          | na                          |
| Provocation concentration                                                                                                                                                                                                                 | †                                                                       | na                          | na                          | na                          |
| Pulmonary function test                                                                                                                                                                                                                   | †                                                                       | †                           | †                           | †                           |
| Insect bite hypersensitivity score (Etude, 2014)                                                                                                                                                                                          | †                                                                       | na                          | na                          | na                          |
| Physical examination : including respiratory and cardiac auscultation, rectal temperature, capillary refill time and colour of mucous membranes, palpation of submandibular lymph nodes, lung auscultation at rest and during rebreathing | †                                                                       | †                           | †                           | †                           |
| Mucus scoring system                                                                                                                                                                                                                      | na                                                                      | †                           | †                           | †                           |
| Bronchoalveolar lavage fluid (including cytology)                                                                                                                                                                                         | na                                                                      | †                           | †                           | †                           |
| Owner reported coughing, nasal discharge at time of examination                                                                                                                                                                           | †                                                                       | †                           | †                           | †                           |
| Reversible airway obstruction (after medical/environmental change)                                                                                                                                                                        | na                                                                      | †                           | na                          | na                          |

† : measured in this group

na : not analysed

Variable influences on the projection scores significant for class prediction from the environmentally mixed group of horses (n=138) after VIP selection.

| Species                    | Allergome name          | Extract = E;<br>Molecule =<br>M | VIP score   |
|----------------------------|-------------------------|---------------------------------|-------------|
| Hevea brasiliensis         | Hev b 11                | M                               | 2.397886012 |
| Hevea brasiliensis         | Hev b 6.02              | M                               | 2.242175574 |
| Hevea brasiliensis         | Hev b 5.0101            | M                               | 2.061708356 |
| Aspergillus fumigatus      | rAsp f 8                | M                               | 2.034462948 |
| Helix aspersa              | Hel as 7                | M                               | 1.693216892 |
| Culicoides obsoletus       | Cul o 145               | M                               | 1.553348148 |
| Hevea brasiliensis         | Hev b 3.0101            | M                               | 1.447433432 |
| Betula verrucosa           | Bet v 2.0101            | M                               | 1.439197666 |
| Culicoides obsoletus       | Cul nu 2                | M                               | 1.401734766 |
| Culicoides nubeculosus     | Cul o1P                 | M                               | 1.370674276 |
| Blattella germanica        | Bla g 2                 | M                               | 1.294109254 |
| Culicoides obsoletus       | Cul o 2                 | M                               | 1.289809746 |
| Mercurialis annua          | Mer a 1                 | M                               | 1.257180767 |
| Bos domesticus             | Bos d LF                | M                               | 1.234823184 |
| Culicoides obsoletus       | Cul ob 8                | M                               | 1.132147319 |
| Prunus persica             | Pru p 3                 | M                               | 1.131899686 |
| Felis domesticus           | Fel d [Epithelia]       | E                               | 1.131671083 |
| Mucor circinelloides       | Muc ci                  | E                               | 1.113604072 |
| Culicoides obsoletus       | C0120                   | M                               | 1.107017518 |
| Quercus robur              | Que r [Pollen]          | E                               | 1.103588161 |
| Culicoides obsoletus       | Cul ob 8                | M                               | 1.10169779  |
| Epicoccum nigrum           | Epi p                   | E                               | 1.097080342 |
| Gallus domesticus          | Gal d [Egg White]       | E                               | 1.092020409 |
| Thermoactinomyces vulgaris | The v                   | E                               | 1.078503603 |
| Culicoides obsoletus       | Cul n 10.03             | M                               | 1.070733631 |
| Hevea brasiliensis         | Hev b                   | E                               | 1.053235133 |
| Ulmus americana            | Ulm a                   | E                               | 1.046124579 |
| Eupatorium capillifolium   | Eup c                   | E                               | 1.041304179 |
| Actinidia deliciosa        | Act d 2                 | M                               | 1.039211209 |
| Glycine max                | Soybean AL3-recombinant | M                               | 1.036586734 |
| Parietaria judaica         | Par j 1                 | M                               | 1.025947792 |
| Blomia tropicalis          | Blo t                   | E                               | 1.024506004 |
| Rattus norvegicus          | Rat n [Epithelium]      | E                               | 1.022811408 |
| Corylus americana          | Cor am                  | E                               | 1.00432009  |
| Culicoides nubeculosus     | Cul ob 8                | M                               | 0.999496997 |
| Lupinus albus              | Lup a [Seed]            | E                               | 0.990564278 |
| Culicoides obsoletus       | Co167                   | M                               | 0.983835139 |

|                                |                    |   |             |
|--------------------------------|--------------------|---|-------------|
| Culicoides obsoletus           | Cul o 8C11         | M | 0.98257687  |
| Eurotium amstelodami           | Eur s              | E | 0.981731287 |
| Penaeus monodon                | Pen m 1            | M | 0.977846295 |
| Zea mays                       | Zea m [Seed]       | E | 0.975934894 |
| Kineosporia rhizophila         | Kin r              | E | 0.96268091  |
| Olea europaea                  | Ole e 1            | M | 0.957886893 |
| Aspegillus flavus              | Asp fl             | E | 0.954692807 |
| Olea europaea                  | Ole e [Pollen]     | E | 0.946553558 |
| Dermatophagoides farinae       | Der f 1            | M | 0.943956016 |
| Geotrichum candidum            | Geo c              | E | 0.934810722 |
| Arachis hypogaea               | Ara h 6            | M | 0.931278284 |
| Helix aspersa                  | Hel as 7           | M | 0.929469269 |
| Gallus domesticus              | Gal d 4            | M | 0.92158607  |
| Parietaria judaica             | Par j              | E | 0.919641275 |
| Culicoides                     | cul o 5            | M | 0.915549349 |
| Helianthus annuus              | Hel a 2S Albumin   | M | 0.915519266 |
| Canis familiaris               | Can f [Epithelium] | E | 0.914611185 |
| Solanum lycopersicum           | Sola l LTP_7kD     | M | 0.909716836 |
| Helianthus annuus              | Hel a [Pollen]     | E | 0.898832645 |
| Periplaneta americana          | Per a 7            | M | 0.892563113 |
| Corylus avellana               | Cor a [Seed]       | E | 0.877063468 |
| Culicoides obsoletus           | Cul o 3            | M | 0.87297805  |
| Dermatophagoides pteronyssinus | Der p 2            | M | 0.866653724 |
| Olea europaea                  | Ole e 2            | M | 0.859525551 |
| Fagopyrum esculentum           | Fag e              | E | 0.859249296 |
| Culicoides obsoletus           | Cul o 6 F10        | M | 0.856052813 |
| Eucalyptus globulus            | Euc g [Pollen]     | E | 0.854059354 |
| Quercus ilex                   | Que i              | E | 0.842572502 |
| Dermatophagoides pteronyssinus | Der p              | E | 0.836111501 |
| Actinidia chinensis            | Act c 10           | M | 0.829294987 |
| Artemisia vulgaris             | Art v 1            | M | 0.824564544 |
| Black fly                      | Sim vi             | E | 0.823110421 |
| Ricinus communis               | Ric c [Pollen]     | E | 0.815160266 |
| Drechslera halodes             | Dre h              | E | 0.807378063 |
| Culicoides nubeculosus         | Cul o 1            | M | 0.799266712 |
| Hevea brasiliensis             | Hev b 9            | M | 0.796595977 |
| Aspergillus versicolor         | Asp v              | E | 0.796427599 |
| Avena sativa                   | Ave s [Seed]       | E | 0.790808149 |
| Actinidia chinensis            | Act c 11           | M | 0.787068315 |
| Manioc                         | Man e              | E | 0.785608616 |
| Glycine max                    | Gly m Agglutinin   | M | 0.78479311  |
| Glycine max                    | Gly m TI           | M | 0.781228253 |

|                                |                 |   |             |
|--------------------------------|-----------------|---|-------------|
| Periplaneta americana          | Per a 7 (0.5mg) | M | 0.779612014 |
| Mus musculus                   | Mus m 1         | M | 0.777665393 |
| Culicoides obsoletus           | Cul o 3         | M | 0.776157103 |
| hay dust                       | Hay d           | E | 0.774529898 |
| Ceratonia siliqua              | Cer si [Seed]   | E | 0.767985414 |
| Culicoides nubeculosus         | Cul nu 12       | M | 0.765522432 |
| Blatta orientalis              | Bla o           | E | 0.760381536 |
| Castanea sativa                | Cas s [Pollen]  | E | 0.748034147 |
| Armoracia rusticana            | Arm r HRP       | E | 0.740446527 |
| Penicillium expansum           | Pen e           | E | 0.734560812 |
| Ctenocephalides felis          | Cte f           | E | 0.716428089 |
| Phleum pratense                | Phl p 1.0102    | M | 0.712552232 |
| Hevea brasiliensis             | Hev b 8         | M | 0.710739268 |
| Merluccius hubbsi              | Mer hu 1        | M | 0.71046373  |
| Dermatophagoides pteronyssinus | Der p 10        | M | 0.7096095   |
| Hevea brasiliensis             | Hev b 1         | M | 0.707560234 |
| Taraxacum officinale           | Tar o [Pollen]  | E | 0.700310884 |
| Acarus siro                    | Aca s           | E | 0.698592024 |
| Culicoides                     | Cul o 6         | M | 0.686143673 |
| Bos domesticus                 | Bos d 5.0102    | M | 0.672595402 |
| Platanus acerifolia            | Pla a 8         | M | 0.669199521 |
| Musa x paradisiaca             | Mus xp          | E | 0.660557    |
| Equus caballus                 | Equ c [Milk]    | E | 0.641591098 |
| Cladosporium herbarum          | Cla h           | E | 0.627312615 |
| Triticum aestivum              | Tri a [Pollen]  | E | 0.625247924 |
| Canis familiaris               | Can f 1         | M | 0.61595743  |
| Saccharomyces cerevisiae       | Sac c           | E | 0.600429374 |
| Culicoides obsoletus           | Cul nu 2        | M | 0.598849656 |
| Carpinus betulus               | Car b           | E | 0.571083305 |
| Arachis hypogaea               | Ara h 1         | M | 0.559353341 |
| Alternaria alternata           | Alt a 1         | M | 0.549001691 |
| Leucanthemum vulgare           | Leu vu          | E | 0.505030455 |
| Brassica                       | Bra n           | E | 0.496039753 |
| Acer saccharinum               | Ace s           | E | 0.343599366 |
